# Supplementary material
Source: PubMed Central journal article supplement (PMC3820339)
Supplement: SD4.pdf [file SD4.pdf]

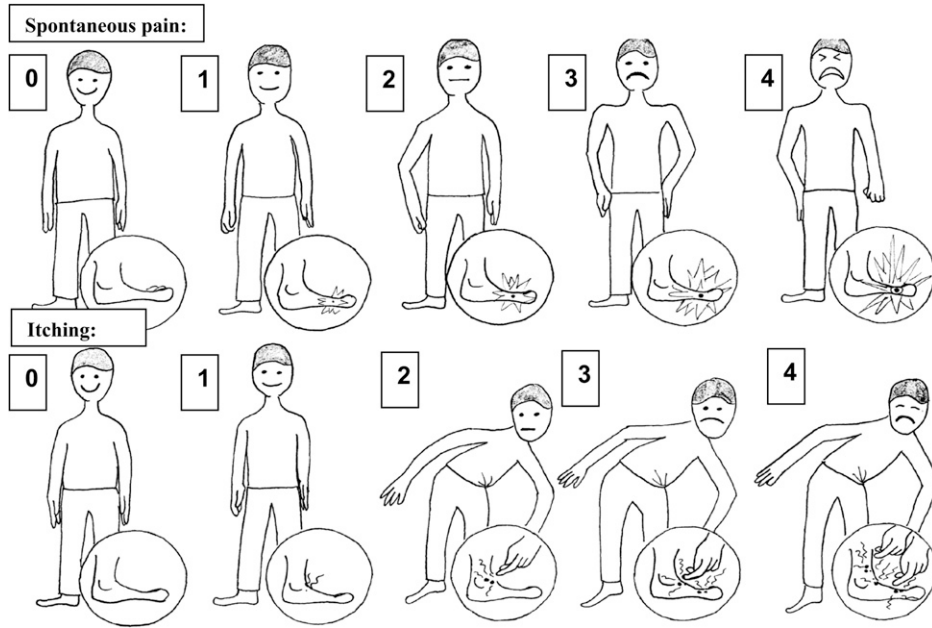

SUPPLEMENTAL FIGURE S1. Electronic Supplemental Material. Visual ordinal scale for the semi-quantitative assessment of pain and itching.
